# Supplementary material for: Using Network Science to Examine Temporal Relationships between 24-Hour Movement Behaviors and Depression During the Transition to College: Protocol for a Prospective Cohort Study
Source: Research Square preprint supplement (doi:10.21203/rs.3.rs-9239716/v1), 2026-04-19
Supplement: Supplementary file 1 [file b0200f68b12a446da883a7c1.docx]

**Supplementary Materials Table 1.** Daily Diary Items (21).

| **Stem** | **Item** | **Construct** | **Scale** |
| --- | --- | --- | --- |
| *Since waking up today, how much have you…* | Had little interest or pleasure in doing things you usually enjoy? | Depression | Not at all (0), A little (1),  Somewhat (2),  Quite a bit (3), Very much (4) |
|  | Felt down, depressed, or hopeless? | Depression |  |
|  | Slept more than usual (e.g., naps, sleeping in)? | Depression |  |
|  | Felt tired or had less energy than usual? | Depression |  |
|  | Had a poor appetite or eaten more than usual? | Depression |  |
|  | Felt bad about yourself (e.g., like you were a failure, or let yourself or your family down)? | Depression |  |
|  | Had trouble concentrating on things (e.g., reading, watching TV)? | Depression |  |
|  | Moved or spoken more slowly than usual, such that other people might have noticed? | Depression |  |
|  | Felt nervous, anxious, or on edge? | Anxiety |  |
|  | Had trouble stopping or controlling your worrying? | Anxiety |  |
|  | Worried too much about different things? | Anxiety |  |
|  | Had trouble relaxing? | Anxiety |  |
|  | Felt so restless that it was hard to sit still? | Anxiety/Depression |  |
|  | Felt more easily annoyed or irritable than usual? | Anxiety |  |
|  | Felt afraid, as if something awful might happen? | Anxiety |  |
| *Since waking up today,…* | How stressful has your day felt overall? | Stress |  |
|  | How happy have you felt overall? | Happiness |  |
|  | ~~How connected have you felt to other people?~~ | ~~Social connection~~ |  |
|  | How demanding have your academic responsibilities felt (e.g., attending class, deadlines, tests)? | Academic demands |  |
|  | How much have you been bothered by injury or illness? | Injury/Sickness |  |
| *Thinking about last night,..* | How would you rate the quality of your sleep? | Sleep quality | Very poor (0)  Poor (1) Fair (2) Good (3) Very good (4) |
|  | Did you have trouble falling asleep or staying asleep? | Depression | Not at all (0),  A little (1), Somewhat (2), Quite a bit (3), Very much (4) |
